# Supplementary material for: Epidemiology of out-of-hospital cardiac arrests caused by anaphylaxis and factors associated with outcomes: an observational study
Source: HighWire-hosted journal article supplement (doi:10.1136/bmjopen-2022-062877), 2022-08-01
Supplement: bmjopen-2022-062877supp001_data_supplement.pdf [file bmjopen-2022-062877supp001_data_supplement.pdf]

Supplemental Table 1 Additional epidemiologic analysis of OHCA cases during the period of 2015 to 2019

| <b>Location/incidence</b>                                | <b>% (N) in OHCA caused by anaphylaxis<br/>(Total number = 167)</b> |
|----------------------------------------------------------|---------------------------------------------------------------------|
| Location                                                 |                                                                     |
| Medical office                                           | 18.6 (31)                                                           |
| Hospital                                                 | 1.2 (2)                                                             |
| Care facilities                                          | 5.4 (9)                                                             |
| Mountain, forest, field, park, and garden                | 11.4 (19)                                                           |
| Sidewalk, river, pond, and others for outdoor activities | 12.0 (20)                                                           |
| Home                                                     | 44.3 (74)                                                           |
| Public                                                   | 4.8 (8)                                                             |
| Workplace                                                | 2.4 (4)                                                             |
| Incidence                                                |                                                                     |
| Epinephrine auto-injection                               | 0.6 (1)                                                             |

OHCA, out-of-hospital cardiac arrest.
