# Supplementary material for: Epidemiology of out-of-hospital cardiac arrests caused by anaphylaxis and factors associated with outcomes: an observational study
Source: HighWire-hosted journal article supplement (doi:10.1136/bmjopen-2022-062877), 2022-08-01
Supplement: bmjopen-2022-062877supp002_data_supplement.pdf [file bmjopen-2022-062877supp002_data_supplement.pdf]

Supplemental Table 2 Factors associated with 1-month survival

| Characteristics of OHCA                          | 1M survival            |                                | Crude OR<br>(95% CI)<br>for 1M survival<br>or P value | Adjusted OR<br>(95% CI)<br>for 1M survival |
|--------------------------------------------------|------------------------|--------------------------------|-------------------------------------------------------|--------------------------------------------|
|                                                  | Survivors<br>(N = 103) | Non-<br>survivors<br>(N = 189) |                                                       |                                            |
| Male patients, % (N)                             | 57.3 (59)              | 73.0 (138)                     | 0.50 (0.30 to 0.82)                                   | 0.48 (0.27 to 0.88)                        |
| Elderly patients, % (N)                          | 46.6 (48)              | 55.0 (104)                     | 0.71 (0.44 to 1.15)                                   | 0.75 (0.42 to 1.34)                        |
| Witness status, % (N)                            |                        |                                |                                                       |                                            |
| Unwitnessed                                      | 9.7 (10)               | 31.2 (59)                      | Reference                                             | Reference                                  |
| Bystander-witnessed                              | 67.0 (69)              | 49.7 (94)                      | 4.33 (2.07 to 9.07)                                   | 4.29 (1.92 to 9.62)                        |
| EMS-witnessed                                    | 23.3 (24)              | 19.1 (36)                      | 3.93 (1.69 to 9.17)                                   | 3.16 (1.25 to 7.94)                        |
| Shockable initial rhythm, % (N)                  | 9.7 (10)               | 4.8 (9)                        | 2.15 (0.84 to 5.48)                                   | 1.80 (0.42 to 7.64)                        |
| Prehospital defibrillation, % (N)                | 13.6 (14)              | 7.4 (14)                       | 1.97 (0.90 to 4.30)                                   | 2.10 (0.61 to 6.56)                        |
| Prehospital epinephrine<br>administration, % (N) | 12.6 (13)              | 29.1 (55)                      | 0.35 (0.18 to 0.68)                                   | 0.45 (0.21 to 0.97)                        |
| Advanced airway management, %<br>(N)             | 11.7 (12)              | 37.0 (70)                      | 0.22 (0.11 to 0.44)                                   | 0.28 (0.14 to 0.58)                        |
| Advanced life support by<br>physician, % (N)     | 17.5 (18)              | 28.6 (54)                      | 0.53 (0.29 to 0.96)                                   | 0.47 (0.21 to 1.05)                        |
| Physician in ambulance, % (N)                    | 10.7 (11)              | 11.6 (22)                      | 0.91 (0.42 to 1.95)                                   | 1.01 (0.36 to 2.84)                        |
| Time intervals, min, median (IQR)                |                        |                                |                                                       |                                            |
| EMS response time                                | 8 (7–11)               | 10 (8–14)                      | P < 0.01                                              | 0.93 (0.87 to 0.99)<br>/1 min              |
| EMS transportation time                          | 24 (17–33)             | 26 (18–34)                     | P = 0.09                                              | 1.06 (0.89 to 1.24)<br>/10 min             |

1M, 1-month; CI, confidence interval; EMS, emergency medical service; IQR, interquartile range; OHCA, out-of-hospital cardiac arrest; OR, odds ratio.
