# Supplementary material for: Epidemiology of out-of-hospital cardiac arrests caused by anaphylaxis and factors associated with outcomes: an observational study
Source: HighWire-hosted journal article supplement (doi:10.1136/bmjopen-2022-062877), 2022-08-01

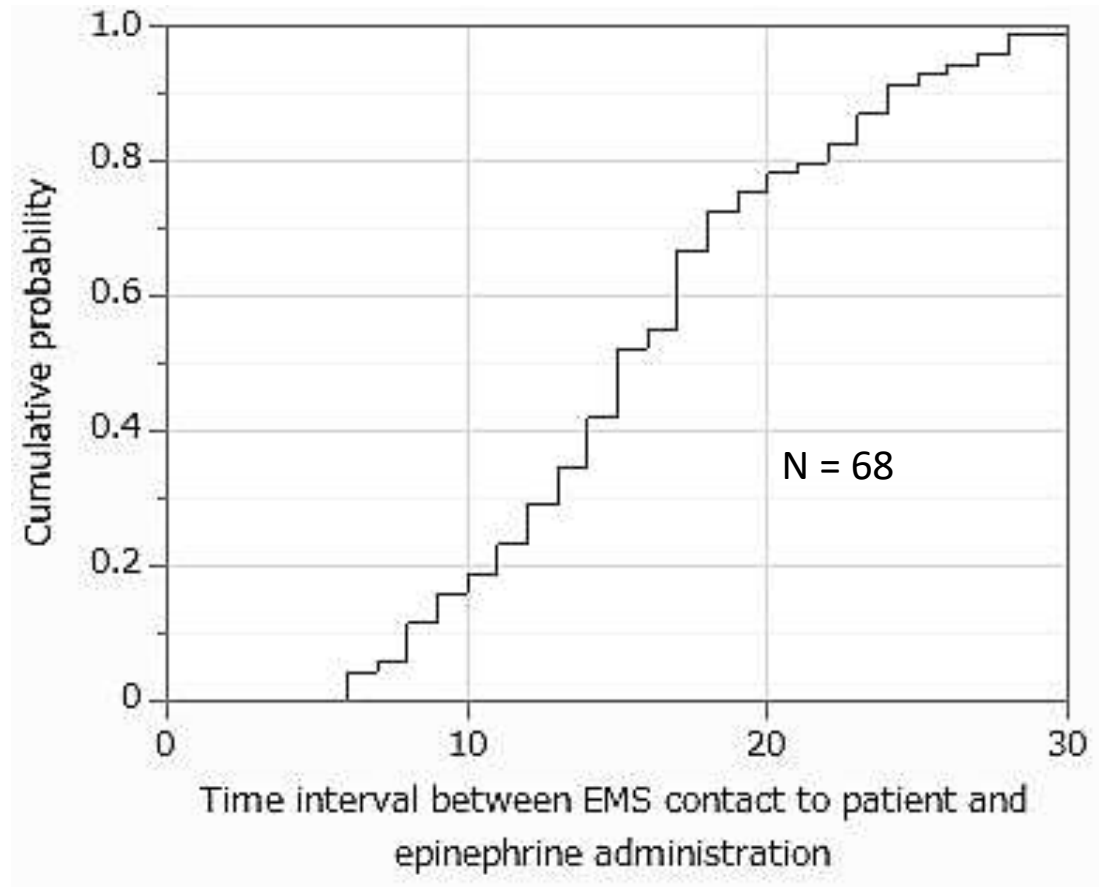

Supplement: bmjopen-2022-062877supp003_data_supplement.pdf [file bmjopen-2022-062877supp003_data_supplement.pdf]
